# Supplementary material
Source: PubMed Central journal article supplement (PMC5504411)
Supplement: figS1.pdf [file figS1.pdf]

## Supplement Material

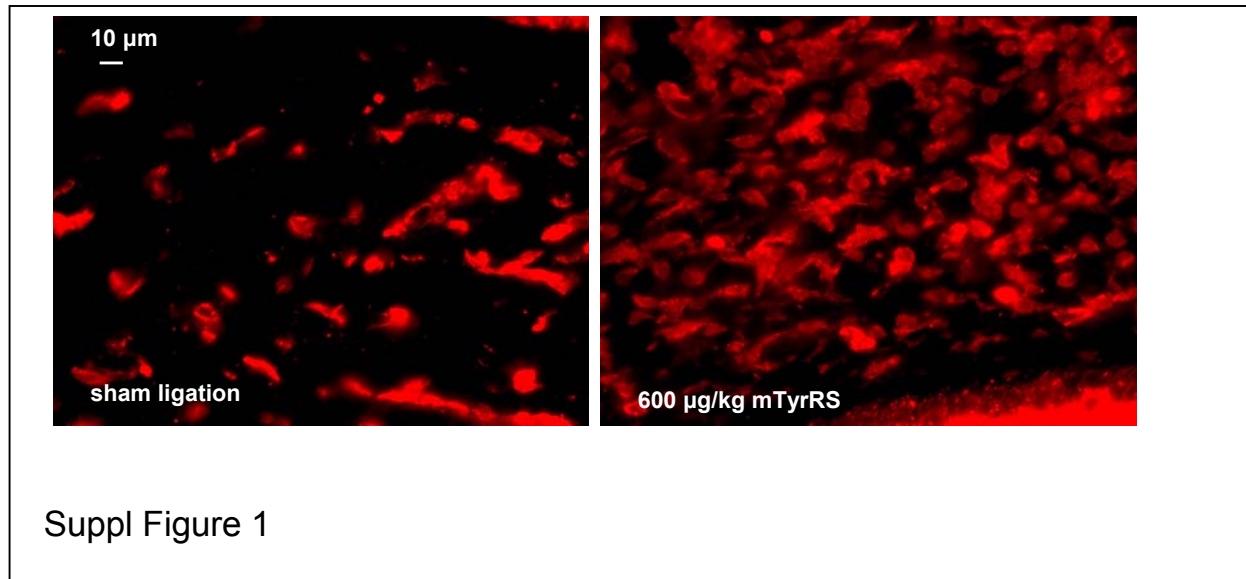

Supplemental Figure 1. Mini-TyrRS has biphasic actions on capillary density seven days after ear artery ligation. Representative 8-micron thick cross-sections of ear stained with anti-CD31 antibody. Average data for this analysis is shown in figure 1 of the journal article.
